# Supplementary material for: CAMSAP2 promotes colorectal cancer cell migration and invasion through activation of JNK/c-Jun/MMP-1 signaling pathway
Source: PubMed Central journal article supplement (PMC9546856; doi:10.1038/s41598-022-21345-7), 2022-10-07

Figure 1F

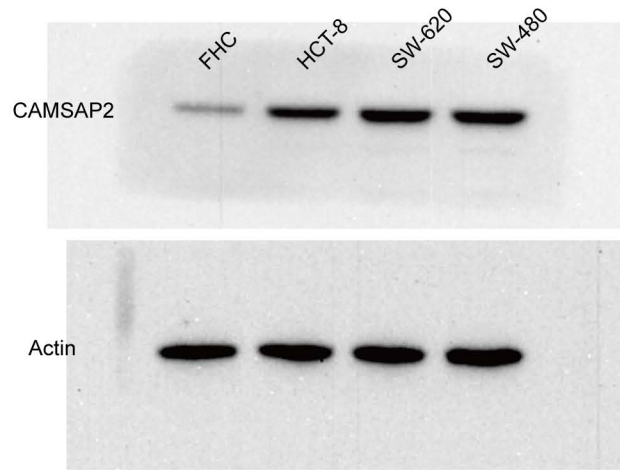

Figure 2B

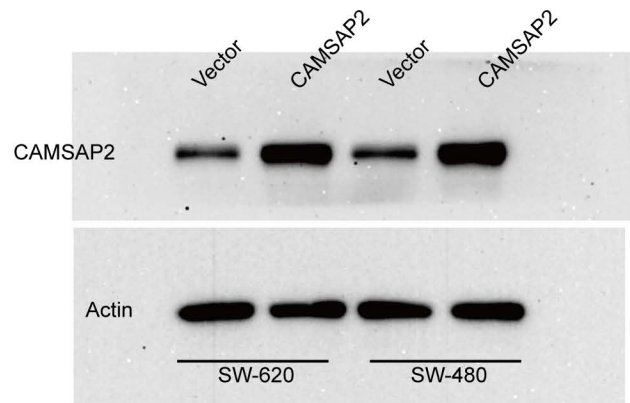

Figure 3B

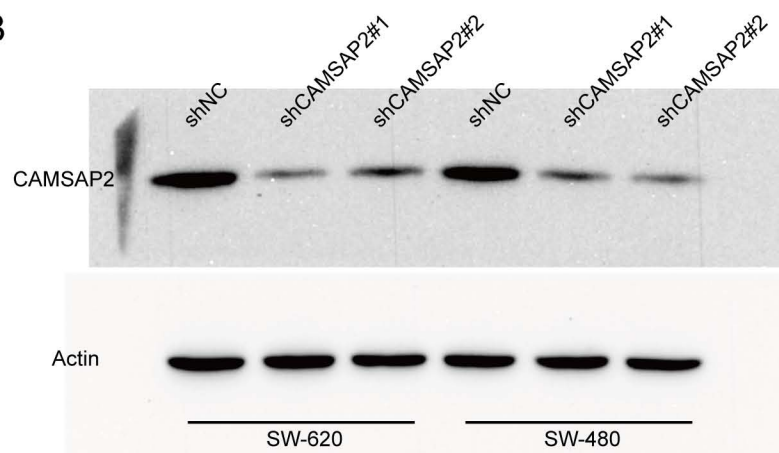

Figure 4

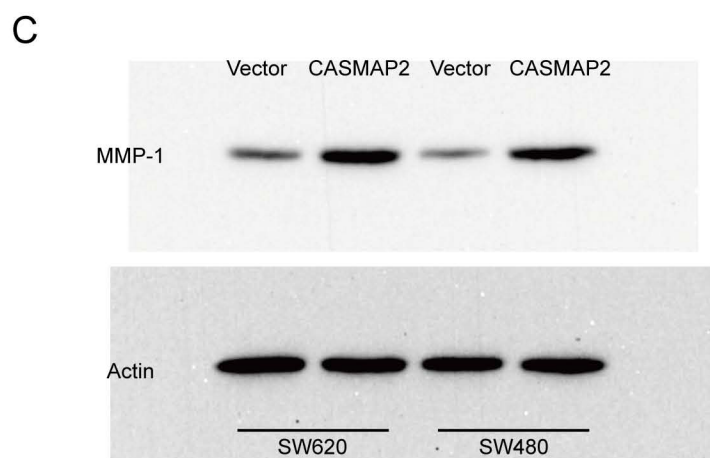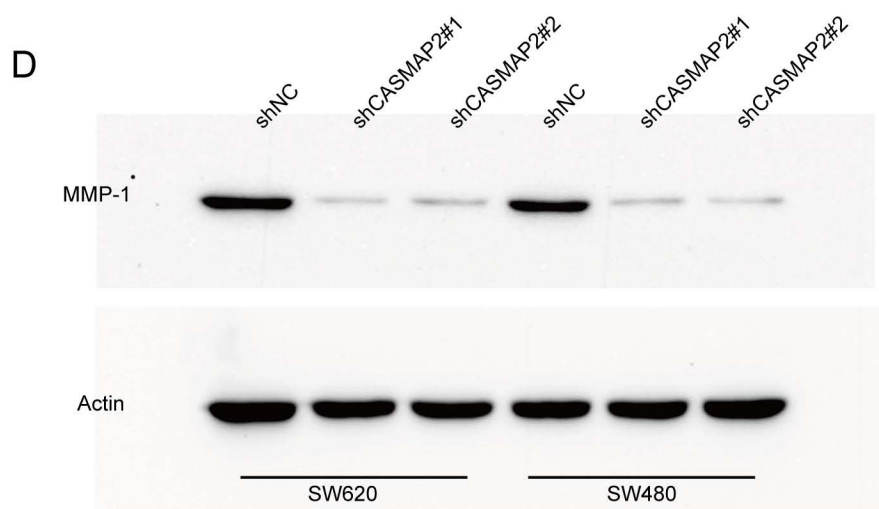

Figure 5

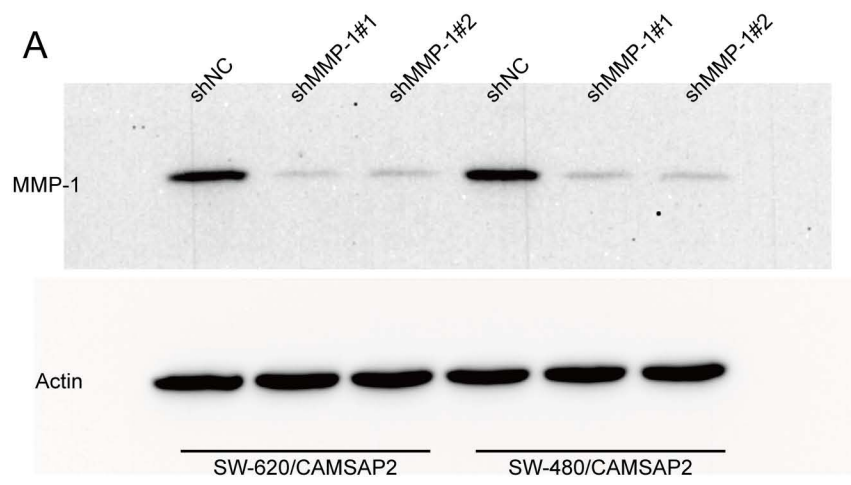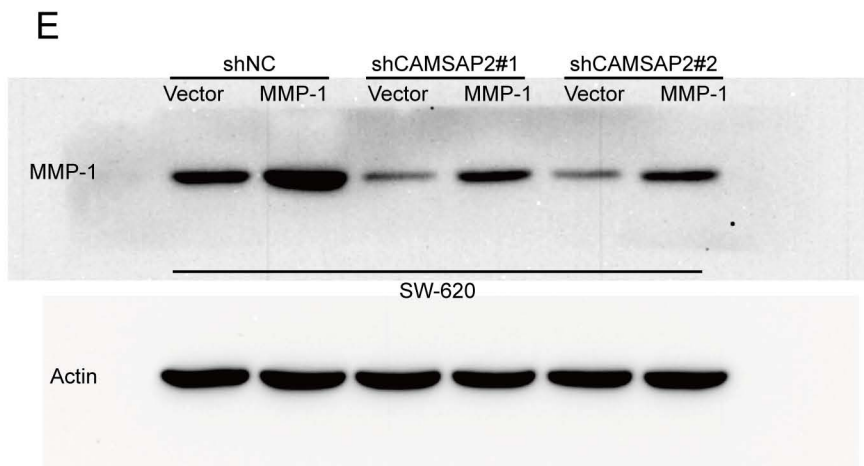

Figure 6

A

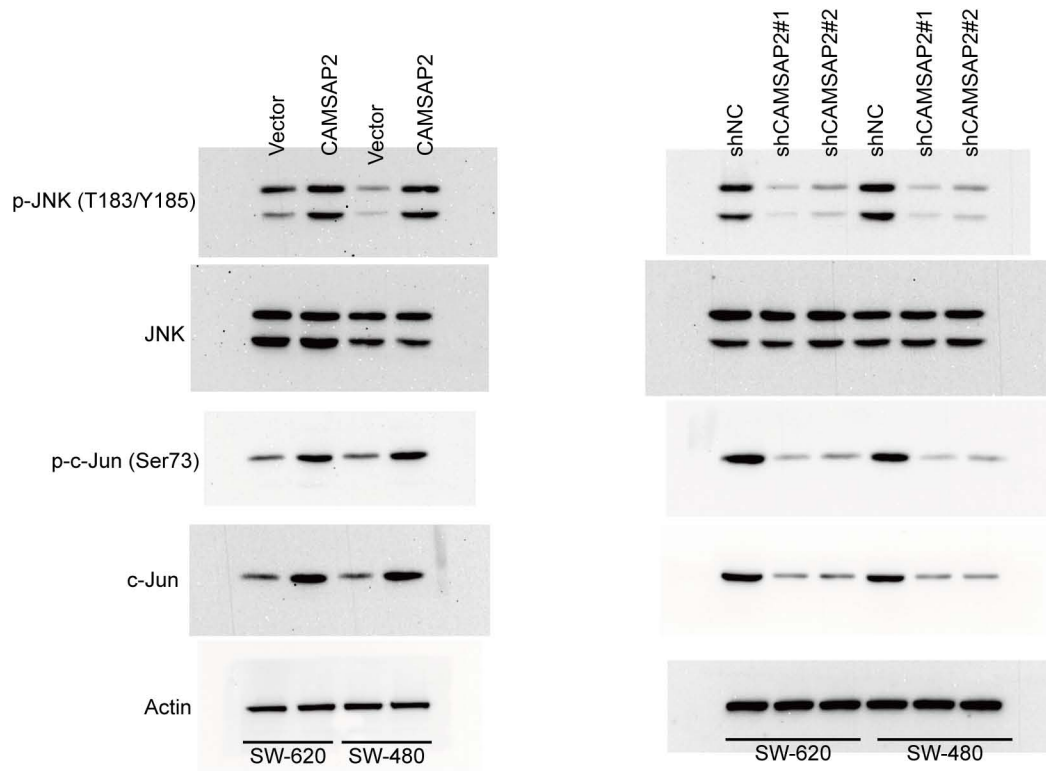

B

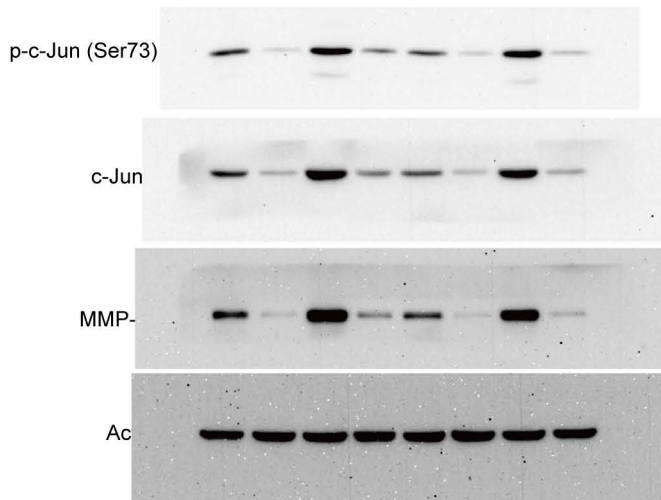

F

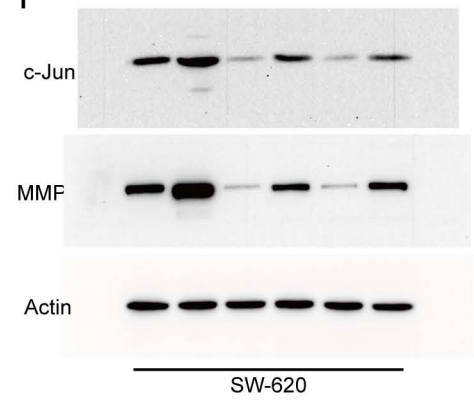

supplementary Figure S1

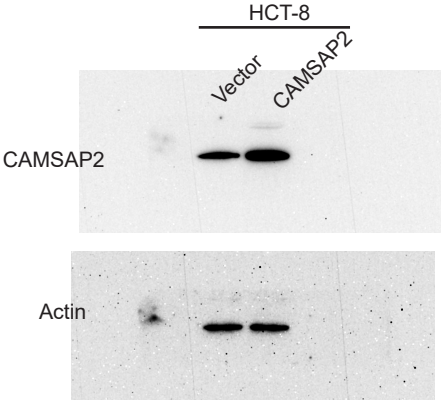

Supplement: 41598_2022_21345_MOESM1_ESM.pdf [file 41598_2022_21345_MOESM1_ESM.pdf]
